# Supplementary material for: Unexpected functional versatility of the pentatricopeptide repeat proteins PGR3, PPR5 and PPR10
Source: PubMed Central journal article supplement — Nucleic Acids Res. 2018 Aug 16;46(19):10448–59. doi: 10.1093/nar/gky737 (PMC6212717; doi:10.1093/nar/gky737), 2018-08-16
Supplement: gky737_supplemental_files.pdf [file gky737_supplemental_files.pdf]

## Supplementary Table S1

### Primers for making probes for RNA gel blot hybridizations

| <b>Arabidopsis</b>             | Forward Primer                                           | Reverse Primer                                 |
|--------------------------------|----------------------------------------------------------|------------------------------------------------|
| <i>16S</i>                     | ATGGATACTAGGCGCTGTGC                                     | GTAATACGACTCACTATAGGGACCTTCCTCCGG<br>CTTATCAC  |
| <i>23S</i>                     | CCTAGATGGCGAGAGTCCAG                                     | GTAATACGACTCACTATAGGGAAGACTCGCTTTC<br>GCTACG   |
| <i>petL</i>                    | ATTTCAATTGAACTTAGGG                                      | GTAATACGACTCACTATAGGGAAATTTGGTAATT<br>AACACGG  |
| <i>rpl14</i>                   | ACAGCGGGGCTAGAGAATTG                                     | GTAATACGACTCACTATAGGGTGGGATCGCCCC<br>AAAAACTC  |
| <i>rpl16</i>                   | AGACAAATAGAAGCAGGG                                       | GTAATACGACTCACTATAGGGCTATATTTTCGGG<br>TACAC    |
| <i>rps8</i>                    | GGAAACATCGCGAAAACAACC                                    | GTAATACGACTCACTATAGGGCGAGCTTCTCGG<br>TCTGTCATT |
| <b>Maize</b>                   | Forward Primer                                           | Reverse Primer                                 |
| <i>rpl14</i>                   | TATACCGTCGTCGCCTTTGA                                     | CCCCTGGTTTTTCTTTCTGG                           |
| <i>rps8</i>                    | GGGCAAGGACACTATTGCTG                                     | CATTCCGCCCAAACCTTAG                            |
| <i>rps3</i>                    | CATTCCTTTTGGTTCGCACA                                     | GCGAATTGTTTGAGGGGTA                            |
| <i>petL</i>                    | GGGGACTCATGTTCCGCTGA                                     | CCCACGAATCTCAATGACCA                           |
| <i>ycf4</i>                    | CAATTCCTTGTCGGGATATC                                     | GCAAGAAATAGCCAATTCG                            |
| <i>psal</i>                    | TCGAATAGATAGAAATAGTAA                                    | CTAGACAATCTTATTTTTCTGC                         |
| <i>psal-ycf4 A oligo probe</i> | GCTATAGTCGGCTACGCATATGCATGCATTTATGCTC<br>GTAGCTTATATCT   |                                                |
| <i>psal-ycf4 B oligo probe</i> | ACTTTCTATTCAAAAAAATTAGTGGATCCACTTAAAA<br>AAAAAACTC       |                                                |
| <i>psal-ycf4 C oligo probe</i> | CTAGTACTCCTGTGAAATAATTGGTTAGATACATTGA<br>CTTTC           |                                                |
| <i>psal-ycf4 D oligo probe</i> | GATTTTTCACTTTACTTTTTTTGATTCTGAAATAGCCTT<br>CAGTAGCTAGTAC |                                                |

### Primers for cloning, genotyping and cRT-PCR in maize

|                  |                                           |
|------------------|-------------------------------------------|
| tk121pgr35'      | TCCACTGGGCTCTTGGTAGC                      |
| tk781pgr33'      | CAAGAACCCGAATGCAGATG                      |
| PGR3 BamHI-For   | CACGGATCCGACGAACGGCGGGTTCGTGGGCACGGACAGCG |
| PGR3-1807R       | GGAGGATAGTACACAGTGTGGC                    |
| PGR3-1254F       | GCAGCTGCTCGAAGAAATGACACG                  |
| PGR3-HindIII-Rev | CACCTCGAGCTACAATTGATTTGGAAGTTGC           |
| tkrpl14_207for2  | ATTCAAAGGCGACGACGGTA                      |
| rpl16PE          | CTAACAGTCACACACTAAGCAT                    |

### Primers for 3'RACE, Arabidopsis

|                     |                                          |
|---------------------|------------------------------------------|
| Adapter for 3' RACE | [Phos]GCNNNTCGTATGCCGTCTTCTGCTTGC[23ddC] |
| PCR primer          | CAAGCAGAAGACGGCATAACG                    |
| rpl14.rp            | ACAGCGGGGCTAGAGAATTG                     |
| RT primer           | CAAGCAGAAGACGGCATA                       |

## Supplementary Figure S1

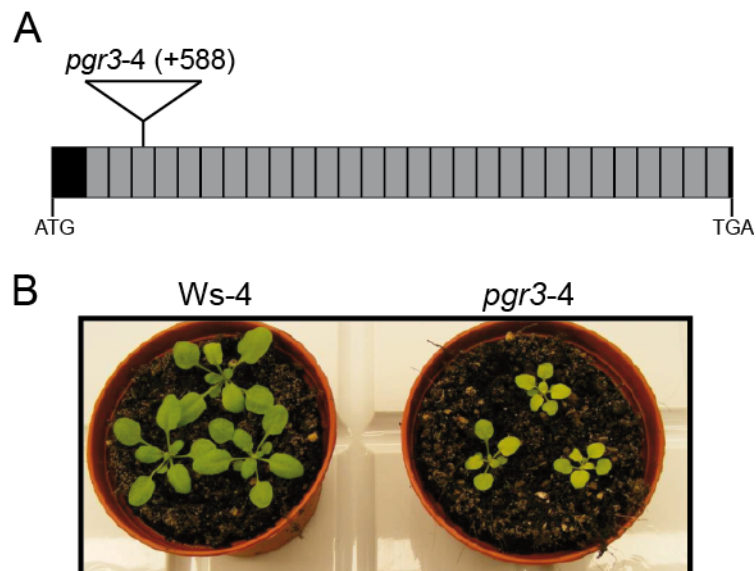

### Supplementary Figure S1. Overview of the *pgr3-4* allele.

(A) Diagram of *PGR3* (At4g31850) showing the position of the T-DNA insertion in the *pgr3-4* allele (FLAG\_086D06). The 28 PPR repeats of *PGR3* are indicated by grey rectangles. The nucleotide position of the T-DNA insertion with respect to the start codon is indicated in parentheses.

(B) Phenotype of wild type (ecotype Ws-4) and *pgr3-4* plants. Seeds were sown in soil and grown for 23-days under 16h light ( $120\mu\text{mol} \times \text{m}^{-2} \times \text{sec}^{-1}$ ) / 8h dark cycles at 23°C.

## Supplementary Figure S2

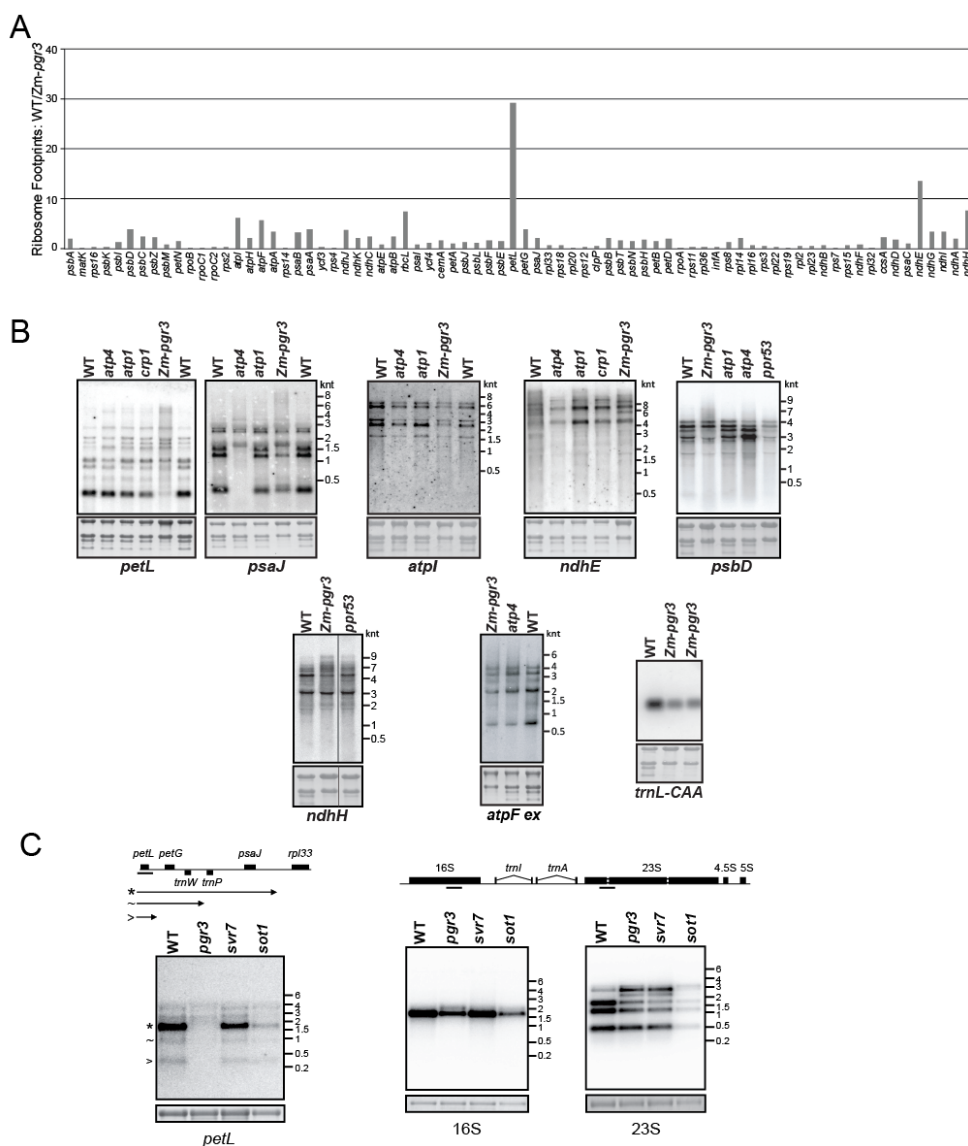

### Supplementary Figure S2. Comparison of chloroplast ribosome footprints in *Zm-pgr3* and wild-type plants and additional RNA gel blot analyses of *pgr3* mutants.

(A) The data for *Zm-pgr3* are the same as those shown in Figure 2B, but are plotted as a ratio with respect to the signal from wild-type siblings. Although *ndhE* expression was reduced in comparison with the wild-type, *ndhE* was expressed similarly in the *Zm-pgr3* and *cps1* mutant (Figure 2B) suggesting that this is a secondary effect of *Zm-pgr3*'s chloroplast ribosome deficiency.

(B) Additional RNA gel blot hybridizations of *Zm-pgr3* mutants. The methylene-blue stained blots are shown below to illustrate rRNA abundance as a loading control. The *petL* data was reported previously (21). Various other non-photosynthetic maize mutants were included as controls: *crp1* (56), *atp4* (37), *atp1* (54), and *ppr53* (41).

(C) RNA gel blot hybridization analyses of the Arabidopsis *pgr3* mutant. The methylene-blue stained blots are shown below to illustrate rRNA abundance as a loading control. The *svr7* (35) and *sot1* (42) mutants (orthologous to maize *atp4* and *ppr53*, respectively), were included as controls.

## Supplementary Figure S3

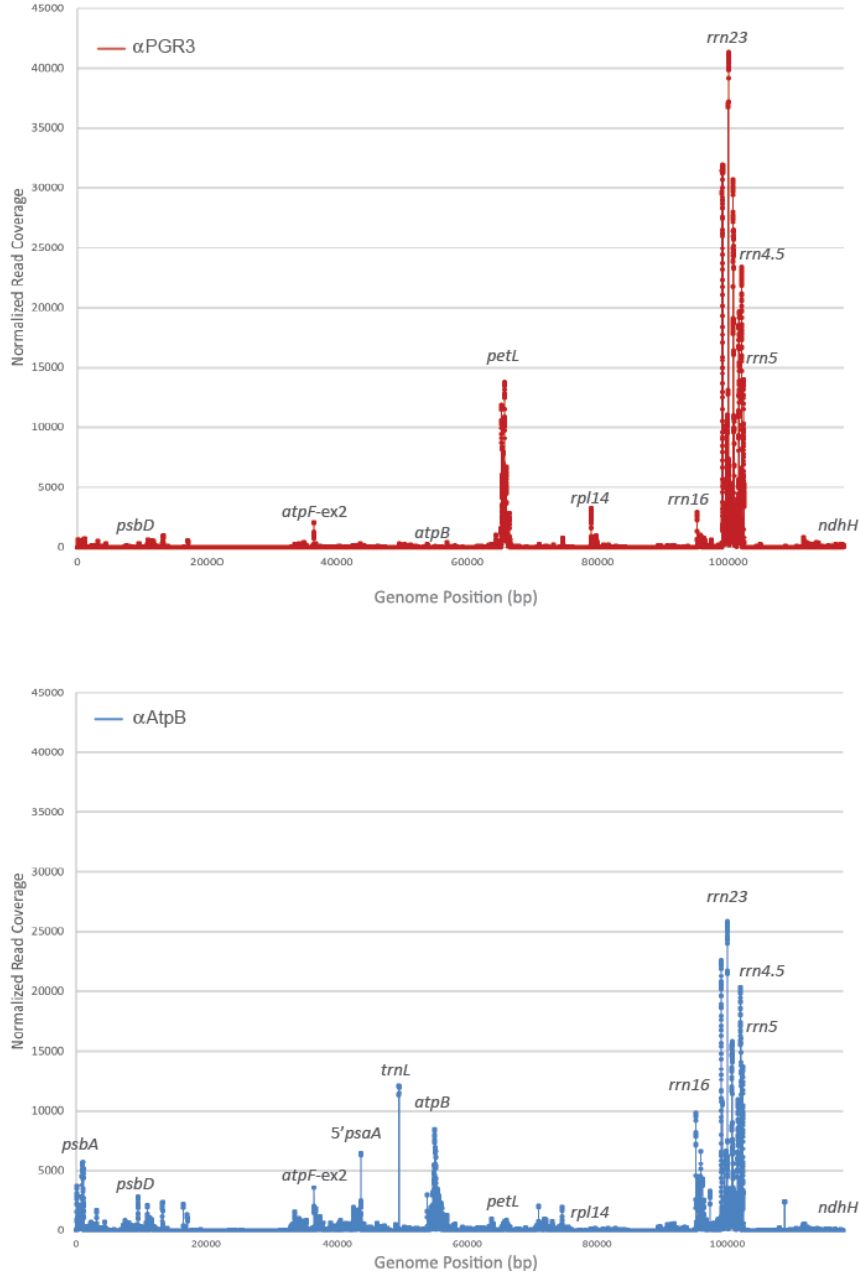

**Supplementary Figure S3. Genome-wide view of Zm-PGR3 RIP-seq data.** Read counts were normalized to the total number of reads mapping to the chloroplast genome, and the normalized values mapping to each 10-nt window across the chloroplast genome is plotted. An immunoprecipitation with an antibody to AtpB served as a negative control. The AtpB antibody immunoprecipitated *atpB* mRNA, presumably via interaction with the nascent peptide exposed from translating ribosomes. The chloroplast rRNAs may derive from ribosomes associated with immunoprecipitated mRNAs, from direct interaction of PGR3 with rRNA sequences, and/or from contamination.
